# Supplementary material for: Impact of Long-term Glycosylated Hemoglobin in Patients with Acute Myocardial Infarction: a retrospective cohort study
Source: PubMed Central journal article supplement (PMC7174312; doi:10.1038/s41598-020-63802-1), 2020-04-21
Supplement: 41598_2020_63802_MOESM1_ESM.pdf [file 41598_2020_63802_MOESM1_ESM.pdf]

**Impact of Long-term Glycosylated Hemoglobin in Patients with Acute Myocardial Infarction: a retrospective cohort study**

Wonjae Lee, MD, MBA<sup>1</sup>, Sun-Hwa Kim, PhD<sup>1</sup>, Chang-Hwan Yoon, MD, PhD<sup>1</sup>, Jung-Won Suh, MD, PhD<sup>1</sup>, Young-Seok Cho, MD, PhD<sup>1</sup>, Tae-Jin Youn, MD, PhD<sup>1</sup>, In-Ho Chae, MD, PhD<sup>1</sup>

<sup>1</sup>Division of Cardiology, Department of Internal Medicine, College of Medicine, Seoul National University and Cardiovascular Center, Seoul National University Bundang Hospital, Seongnam-si, Gyeonggi-do, Korea

**Supplementary Fig. S1. Glycated hemoglobin (HbA1c) levels before and after acute myocardial infarction in the three groups stratified by HbA1c levels**

A total of 391 patients (110 in group C, 259 in group B, and 22 in group A) with pre-admission HbA1c data were analyzed. The average HbA1c levels from before to after admission differed significantly only in group A.

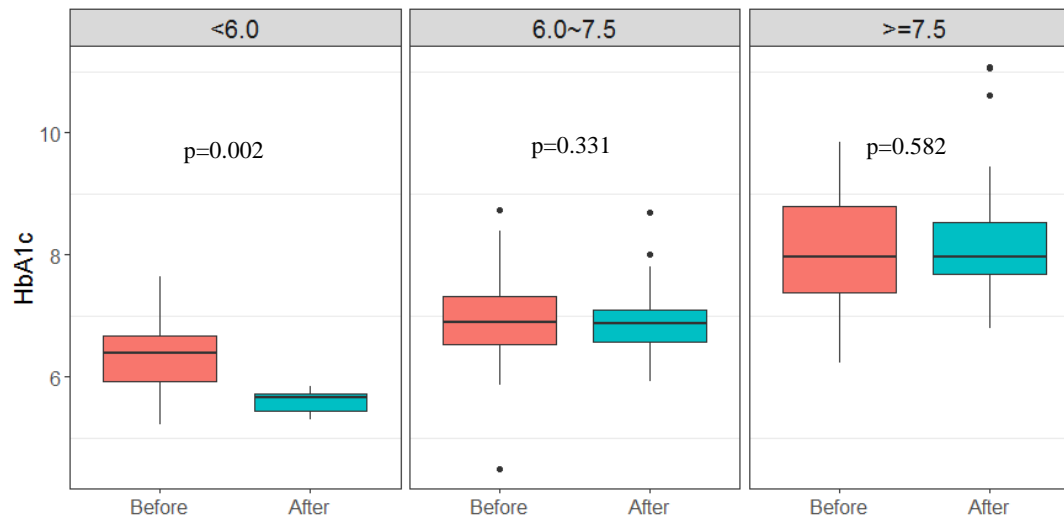

**Supplementary Fig. S2. Prognosis of patients with acute myocardial infarction according to glycated hemoglobin (HbA1c)**

**level in the original cohort: A landmark analysis at 1 year**

No difference in all-cause mortality was observed at 1 year (A). However, the curves started to diverge after 1 year (B).

**A. Until 1 year**

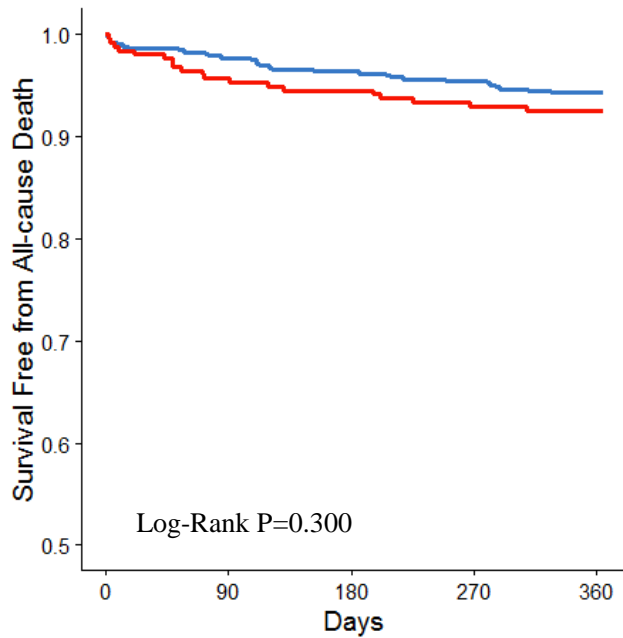

|        |     |     |     |     |     |
|--------|-----|-----|-----|-----|-----|
| — <7.5 | 527 | 515 | 508 | 503 | 497 |
| — ≥7.5 | 256 | 245 | 242 | 238 | 237 |

**B. After 1 year**

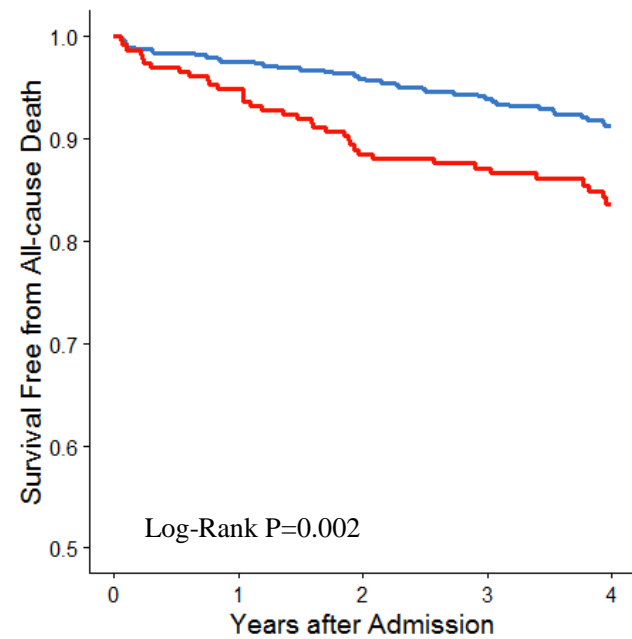

|        |     |     |     |     |     |
|--------|-----|-----|-----|-----|-----|
| — <7.5 | 497 | 485 | 453 | 384 | 313 |
| — ≥7.5 | 237 | 225 | 200 | 176 | 134 |

**Supplementary Fig. S3. Prognosis of patients with acute myocardial infarction according to the glycated hemoglobin (HbA1c) level in the inverse propensity of treatment weight (IPTW) cohort: A landmark analysis at 1 year**

No difference in all-cause mortality was observed at 1 year (A). However, the curves started to diverge after 1 year (B).

**A. IPTW cohort until 1 year**

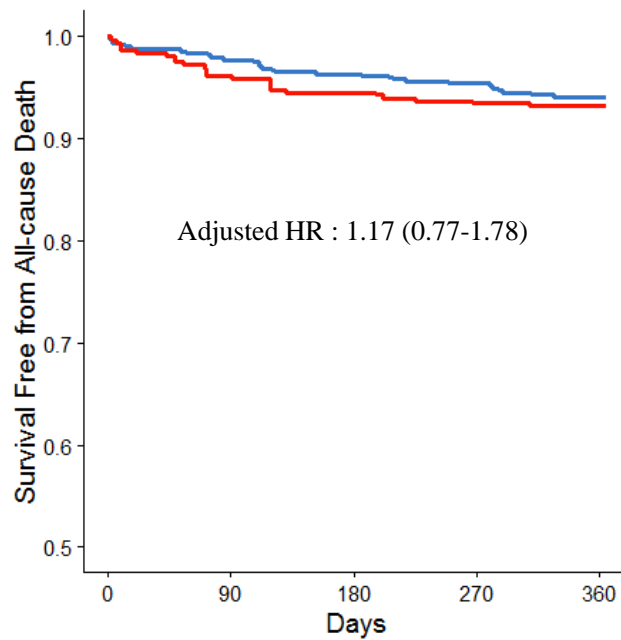

|   |      |     |     |     |     |     |
|---|------|-----|-----|-----|-----|-----|
| — | <7.5 | 724 | 708 | 698 | 691 | 682 |
| — | ≥7.5 | 645 | 620 | 610 | 603 | 602 |

**B. IPTW cohort after 1 year**

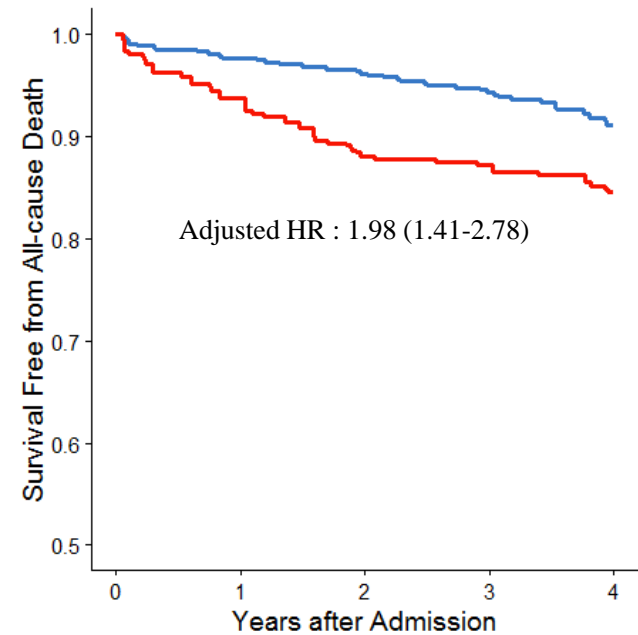

|   |      |     |     |     |     |     |
|---|------|-----|-----|-----|-----|-----|
| — | <7.5 | 682 | 666 | 625 | 532 | 434 |
| — | ≥7.5 | 602 | 565 | 504 | 453 | 340 |

**Supplementary Fig. S4. Prognosis of patients with acute myocardial infarction according to the HbA1c groups**

**A. IPTW cohort with known DM**

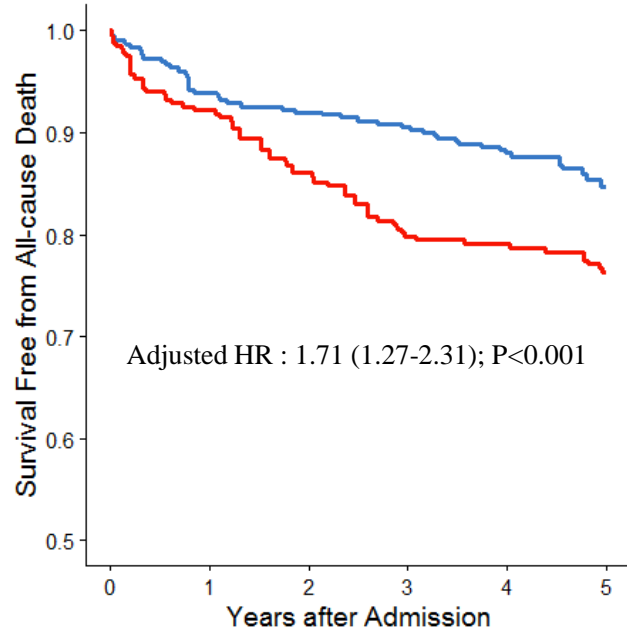

|         |     |     |     |     |     |     |
|---------|-----|-----|-----|-----|-----|-----|
| — <7.5  | 506 | 476 | 466 | 435 | 362 | 286 |
| — >=7.5 | 464 | 429 | 400 | 356 | 313 | 253 |

**B. IPTW cohort with newly diagnosed DM**

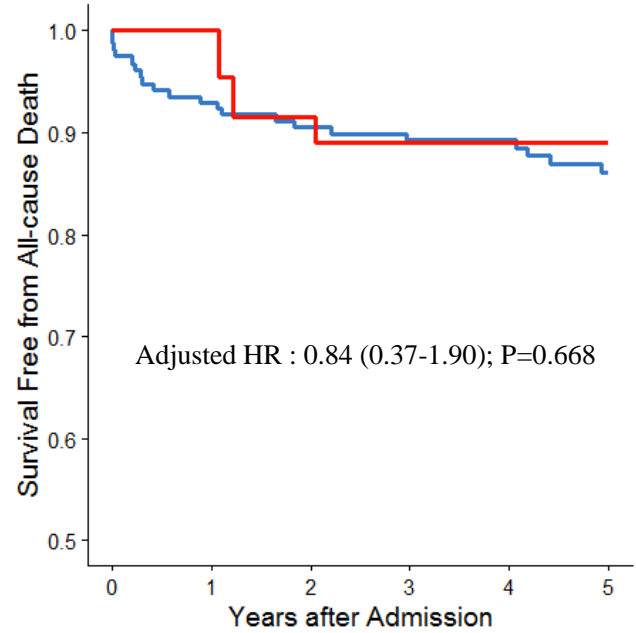

|         |     |     |     |     |     |     |
|---------|-----|-----|-----|-----|-----|-----|
| — <7.5  | 176 | 164 | 160 | 150 | 132 | 108 |
| — >=7.5 | 69  | 69  | 63  | 55  | 53  | 26  |

Supplementary Table S1. Estimated Kaplan–Meier Events Rates Over 5 Years

|                                    | Group B          | Group C          | P value |
|------------------------------------|------------------|------------------|---------|
| All cause Death                    | 0.14 (0.11-0.17) | 0.23 (0.17-0.28) | 0.002   |
| Non-fatal Myocardial Infarction    | 0.04 (0.02-0.05) | 0.06 (0.03-0.09) | 0.100   |
| Admission for Heart Failure        | 0.05 (0.03-0.07) | 0.12 (0.07-0.16) | 0.002   |
| Stroke                             | 0.04 (0.03-0.06) | 0.03 (0.01-0.05) | 0.400   |
| MACE                               | 0.18 (0.15-0.22) | 0.27 (0.21-0.32) | 0.009   |
| MACE + Admission for Heart Failure | 0.20 (0.17-0.24) | 0.30 (0.25-0.35) | 0.006   |

MACE, major adverse cardiovascular event

Supplementary Table S2. The glyceimic variability (standard deviation) of blood glucose and HbA1c of patients

|                      | All         | Group A     | Group B     | Group C     | P value among three groups | P value between group B vs C |
|----------------------|-------------|-------------|-------------|-------------|----------------------------|------------------------------|
| <b>Blood glucose</b> |             |             |             |             |                            |                              |
| Mean±SD              | 49.18±39.96 | 32.01±16.71 | 42.98±40.84 | 66.53±34.90 | <0.001                     | <0.001                       |
| Mean±SE              | 49.18±1.59  | 32.01±3.05  | 42.98±1.99  | 66.53±2.59  | <0.001                     | <0.001                       |
| <b>HbA1c</b>         |             |             |             |             |                            |                              |
| Mean±SD              | 0.59±0.41   | 0.37±0.25   | 0.47±0.29   | 0.87±0.51   | <0.001                     | <0.001                       |
| Mean±SE              | 0.59±0.02   | 0.37±0.05   | 0.47±0.01   | 0.87±0.04   | <0.001                     | <0.001                       |

SD, standard deviation; SE, standard error; HbA1c, glycated hemoglobin
